# Supplementary material for: Clinical Isolation of Anaplasma phagocytophilum in South Korea
Source: PubMed Central journal article supplement (PMC5805025; doi:10.4269/ajtmh.16-0529), 2017-10-30
Supplement: tpmd160529.SD1.pdf [file tpmd160529.SD1.pdf]

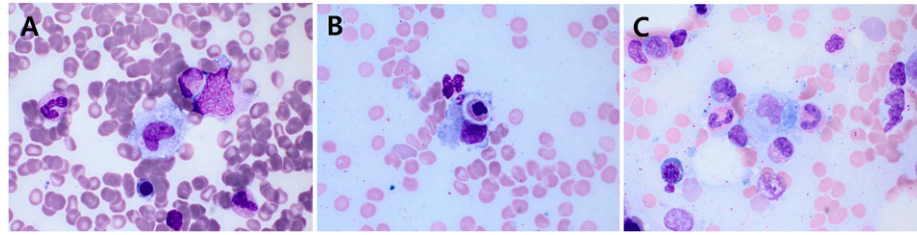

SUPPLEMENTAL FIGURE 1. An aspirate smear showing hemphagocytic histiocyte-engulfing platelets or neutrophils as well as a histiocyte containing mulberry-like intravacuolar inclusions suggestive of morulae of *Anaplasma phagocytophilum* (Wright-Giemsa stain,  $\times 1000$ ).

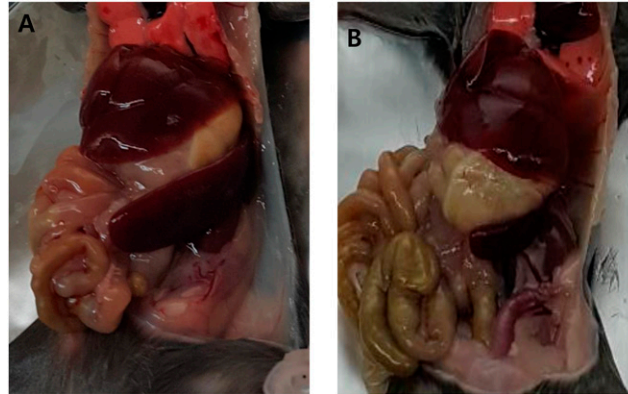

SUPPLEMENTAL FIGURE 2. Spleen of a C3H/HeJ mouse infected with the patient's buffy coat; day 14; splenomegaly. The spleen is twice as large as normal.

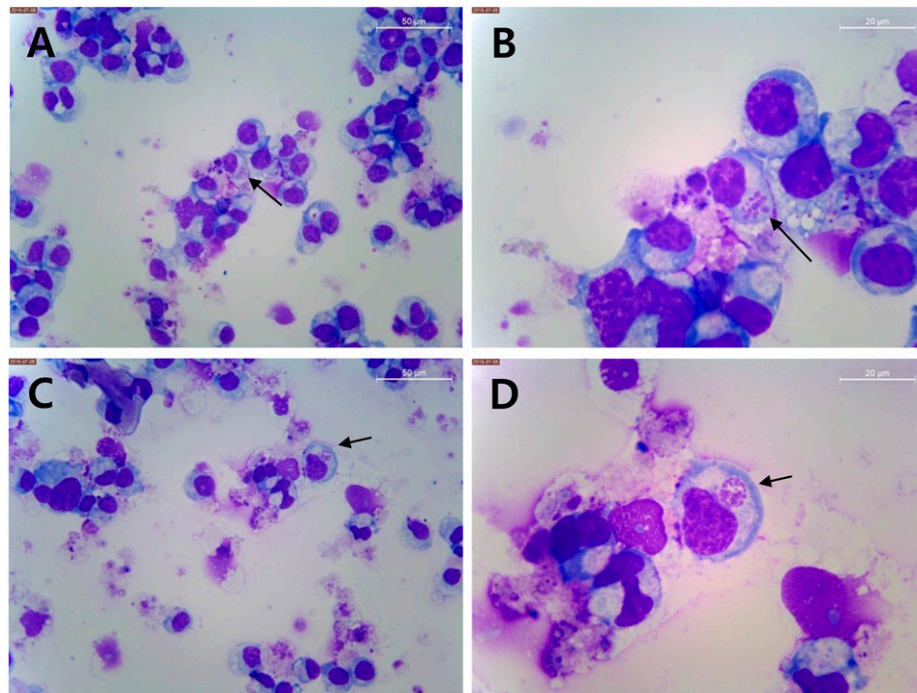

SUPPLEMENTAL FIGURE 3. Light micrograph of *Anaplasma phagocytophilum* cultured in a human promyelocytic cell line (A-D; Diff-Quik staining). Original magnification (A and C;  $\times 400$ , B and D;  $\times 1,000$ ).
